# Supplementary material for: Prospective quality of life assessment after hip and knee arthroplasty: short- and mid-term follow-up results
Source: PubMed Central journal article supplement — Arthroplast Today. 2016 Nov 15;3(2):125–30. doi: 10.1016/j.artd.2016.09.008 (PMC5485233; doi:10.1016/j.artd.2016.09.008), 2016-11-15
Supplement: mmc1.pdf [file mmc1.pdf]

# CONFLICT OF INTEREST STATEMENT

## *Arthroplasty Today*

(Adopted from the American Academy of Orthopaedic Surgeons disclosure statement)

The following form **must be filled out completely and submitted by each author (example, 6 authors, 6 forms). If no discloser is required, please write/type "none" at the end of each sentence.**

Prospective Quality of Life Assessment After Hip and Knee Arthroplasty: Short and Mid-term Follow-up Results

---

Manuscript Title

1. Royalties from a company or supplier (The following conflicts were disclosed)  
NONE
2. Speakers bureau/paid presentations for a company or supplier (The following conflicts were disclosed)  
NONE
- 3A. Paid employee for a company or supplier (The following conflicts were disclosed)  
NONE
- 3B. Paid consultant for a company or supplier (The following conflicts were disclosed)  
NONE
- 3C. Unpaid consultants for a company or supplier (The following conflicts were disclosed)  
NONE
4. Stock or stock options in a company or supplier (The following conflicts were disclosed)  
NONE
5. Research support from a company or supplier as a Principal Investigator (The following conflicts were disclosed)  
NONE
6. Other financial or material support from a company or supplier (The following conflicts were disclosed)  
NONE
7. Royalties, financial or material support from publishers (The following conflicts were disclosed)  
NONE
8. Medical/Orthopaedic publications editorial/governing board (The following conflicts were disclosed)  
NONE
9. Board member/committee appointments for a society (The following conflicts were disclosed)  
NONE

**Each author must sign AND print or type his/her name, date and submit a separate form**

In addition, one BLINDED Conflict of Interest form (no author names used) should be submitted per manuscript with all author disclosures.

ALFREDO MARTINEZ RONDANELLI

March 11 - 2016

---

Author Name (Print or Type)

Author Signature

Date

# CONFLICT OF INTEREST STATEMENT

## *Arthroplasty Today*

(Adopted from the American Academy of Orthopaedic Surgeons disclosure statement)

The following form **must be filled out completely and submitted by each author (example, 6 authors, 6 forms). If no discloser is required, please write/type "none" at the end of each sentence.**

Prospective Quality of Life Assessment After Hip and Knee Arthroplasty: Short and Mid-term Follow-up Results

---

Manuscript Title

1. Royalties from a company or supplier (The following conflicts were disclosed)  
NONE
2. Speakers bureau/paid presentations for a company or supplier (The following conflicts were disclosed)  
NONE
- 3A. Paid employee for a company or supplier (The following conflicts were disclosed)  
NONE
- 3B. Paid consultant for a company or supplier (The following conflicts were disclosed)  
NONE
- 3C. Unpaid consultants for a company or supplier (The following conflicts were disclosed)  
NONE
4. Stock or stock options in a company or supplier (The following conflicts were disclosed)  
NONE
5. Research support from a company or supplier as a Principal Investigator (The following conflicts were disclosed)  
NONE
6. Other financial or material support from a company or supplier (The following conflicts were disclosed)  
NONE
7. Royalties, financial or material support from publishers (The following conflicts were disclosed)  
NONE
8. Medical/Orthopaedic publications editorial/governing board (The following conflicts were disclosed)  
NONE
9. Board member/committee appointments for a society (The following conflicts were disclosed)  
NONE

**Each author must sign AND print or type his/her name, date and submit a separate form**

In addition, one BLINDED Conflict of Interest form (no author names used) should be submitted per manuscript with all author disclosures.

JUAN PABLO MARTINEZ CANO

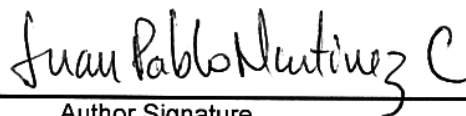

March 11 - 2016

---

Author Name (Print or Type)

Author Signature

Date

# CONFLICT OF INTEREST STATEMENT

## *Arthroplasty Today*

(Adopted from the American Academy of Orthopaedic Surgeons disclosure statement)

The following form **must be filled out completely and submitted by each author (example, 6 authors, 6 forms). If no discloser is required, please write/type "none" at the end of each sentence.**

Prospective Quality of Life Assessment After Hip and Knee Arthroplasty: Short and Mid-term Follow-up Results

---

Manuscript Title

1. Royalties from a company or supplier (The following conflicts were disclosed)  
NONE
2. Speakers bureau/paid presentations for a company or supplier (The following conflicts were disclosed)  
NONE
- 3A. Paid employee for a company or supplier (The following conflicts were disclosed)  
NONE
- 3B. Paid consultant for a company or supplier (The following conflicts were disclosed)  
NONE
- 3C. Unpaid consultants for a company or supplier (The following conflicts were disclosed)  
NONE
4. Stock or stock options in a company or supplier (The following conflicts were disclosed)  
NONE
5. Research support from a company or supplier as a Principal Investigator (The following conflicts were disclosed)  
NONE
6. Other financial or material support from a company or supplier (The following conflicts were disclosed)  
NONE
7. Royalties, financial or material support from publishers (The following conflicts were disclosed)  
NONE
8. Medical/Orthopaedic publications editorial/governing board (The following conflicts were disclosed)  
NONE
9. Board member/committee appointments for a society (The following conflicts were disclosed)  
NONE

**Each author must sign AND print or type his/her name, date and submit a separate form**

In addition, one BLINDED Conflict of Interest form (no author names used) should be submitted per manuscript with all author disclosures.

ANA SOFIA ARANGO GUTIERREZ

Ana Sofia Arango G.

March 11 - 2016

---

Author Name (Print or Type)

Author Signature

Date

# CONFLICT OF INTEREST STATEMENT

## *Arthroplasty Today*

(Adopted from the American Academy of Orthopaedic Surgeons disclosure statement)

The following form **must be filled out completely and submitted by each author (example, 6 authors, 6 forms). If no discloser is required, please write/type "none" at the end of each sentence.**

Prospective Quality of Life Assessment After Hip and Knee Arthroplasty: Short and Mid-term Follow-up Results

---

Manuscript Title

1. Royalties from a company or supplier (The following conflicts were disclosed)  
NONE
2. Speakers bureau/paid presentations for a company or supplier (The following conflicts were disclosed)  
NONE
- 3A. Paid employee for a company or supplier (The following conflicts were disclosed)  
NONE
- 3B. Paid consultant for a company or supplier (The following conflicts were disclosed)  
NONE
- 3C. Unpaid consultants for a company or supplier (The following conflicts were disclosed)  
NONE
4. Stock or stock options in a company or supplier (The following conflicts were disclosed)  
NONE
5. Research support from a company or supplier as a Principal Investigator (The following conflicts were disclosed)  
NONE
6. Other financial or material support from a company or supplier (The following conflicts were disclosed)  
NONE
7. Royalties, financial or material support from publishers (The following conflicts were disclosed)  
NONE
8. Medical/Orthopaedic publications editorial/governing board (The following conflicts were disclosed)  
NONE
9. Board member/committee appointments for a society (The following conflicts were disclosed)  
NONE

**Each author must sign AND print or type his/her name, date and submit a separate form**

In addition, one BLINDED Conflict of Interest form (no author names used) should be submitted per manuscript with all author disclosures.

ALFREDO SANCHEZ VERGEL



March 11 - 2016

---

Author Name (Print or Type)

Author Signature

Date
