# Supplementary material for: Prospective quality of life assessment after hip and knee arthroplasty: short- and mid-term follow-up results
Source: PubMed Central journal article supplement — Arthroplast Today. 2016 Nov 15;3(2):125–30. doi: 10.1016/j.artd.2016.09.008 (PMC5485233; doi:10.1016/j.artd.2016.09.008), 2016-11-15
Supplement: mmc2.pdf [file mmc2.pdf]

# CONFLICT OF INTEREST STATEMENT

## *Arthroplasty Today*

(Adopted from the American Academy of Orthopaedic Surgeons disclosure statement)

The following form **must be filled out completely and submitted by each author (example, 6 authors, 6 forms). If no disclosure is required, please write/type "none" at the end of each sentence.**

Manuscript Title: **Prospective quality of life assessment after hip and knee arthroplasty: short- and mid-term follow-up results**

1. Royalties from a company or supplier (The following conflicts were disclosed)

NONE

2. Speakers bureau/paid presentations for a company or supplier (The following conflicts were disclosed)

NONE

3A. Paid employee for a company or supplier (The following conflicts were disclosed)

NONE

3B. Paid consultant for a company or supplier (The following conflicts were disclosed)

NONE

3C. Unpaid consultants for a company or supplier (The following conflicts were disclosed)

NONE

4. Stock or stock options in a company or supplier (The following conflicts were disclosed)

NONE

5. Research support from a company or supplier as a Principal Investigator (The following conflicts were disclosed)

NONE

6. Other financial or material support from a company or supplier (The following conflicts were disclosed)

NONE

7. Royalties, financial or material support from publishers (The following conflicts were disclosed)

NONE

8. Medical/Orthopaedic publications editorial/governing board (The following conflicts were disclosed)

NONE

9. Board member/committee appointments for a society (The following conflicts were disclosed)

NONE

**Each author must sign AND print or type his/her name, date and submit a separate form**

In addition, one BLINDED Conflict of Interest form (no author names used) should be submitted per manuscript with all author disclosures.

Juan Pablo Herrera-Escobar

Author Name (Print or Type)

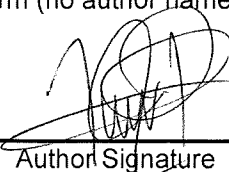

Author Signature

4/29/2016

Date
